# Supplementary material for: Characterization of the Protein and Carbohydrate Related Quality Traits of a Large Set of Spelt Wheat Genotypes
Source: MDPI journal article supplement (doi:10.3390/foods11142061), 2022-07-12
Supplement: s1 [file s1]

Table S1: Average of the physical, compositional, breadmaking and starch quality traits in the individual spelt genotypes grown in Hungary (Martonvásár, 2017–2019).

| Variety               | Country | Spike morphology                      | Type of Spike | Colour of Spike | Form of spelt type | D all | D composition | D quality | D starch | Test weight | TK W  | KW dth | KL en | Flour yield | Prot ein | Star ch | B glucan | Glut en | Gluten spread | GI    | Zele Development Time | Dough Stability | Dough Softening at 12 min | Water absorption | Farinograph quality number | Falling Number | Peak Viscosity | Trough Viscosity | Breakdown | Final Viscosity | Setback | Pasting Time | Pasting Temperature | Starch Damage |       |
|-----------------------|---------|---------------------------------------|---------------|-----------------|--------------------|-------|---------------|-----------|----------|-------------|-------|--------|-------|-------------|----------|---------|----------|---------|---------------|-------|-----------------------|-----------------|---------------------------|------------------|----------------------------|----------------|----------------|------------------|-----------|-----------------|---------|--------------|---------------------|---------------|-------|
| N=92, 3-years average |         | (based on combination of D-F columns) |               |                 |                    |       |               |           |          | kg/100l     | g     | mm     | mm    | %           | %        | %       | mg/g     | %       | mm            | ml    | min                   | min             |                           | %                |                            | sec            | cP             | cP               | cP        | cP              | cP      | min          | C                   | UCD           |       |
| ALBISPICATUM          | AUS     | 5                                     | AWN           | WHITE           | spelt type         | 3     | 3             | 7         | 2        | 72.80       | 33.90 | 2.75   | 7.20  | 56.52       | 19.95    | 52.50   | 6.12     | 50.83   | 14.00         | 50.33 | 31.00                 | 1.70            | 2.00                      | 88.00            | 56.75                      | 46.85          | 332.00         | 3496.50          | 1745.50   | 1751.00         | 3918.50 | 2173.00      | 9.00                | 62.23         | 14.20 |
| ALBI-SPICATUM         | AUS     | 2                                     | AWNLES S      | WHITE           | spelt type         | 4     | 5             | 3         | 3        | 66.25       | 35.72 | 3.00   | 7.27  | 56.71       | 19.45    | 52.00   | 7.25     | 45.22   | 8.67          | 73.27 | 47.00                 | 2.13            | 2.87                      | 113.67           | 57.80                      | 42.30          | 385.00         | 3721.50          | 1875.50   | 1846.00         | 3944.00 | 2068.50      | 9.13                | 63.78         | 10.75 |
| ALBUM                 | AUS     | 2                                     | AWNLES S      | WHITE           | spelt type         | 8     | 2             | 5         | 6        | 71.10       | 37.00 | 2.77   | 7.57  | 53.26       | 18.81    | 52.37   | 6.73     | 47.83   | 8.17          | 61.53 | 34.33                 | 9.17            | 13.50                     | 43.33            | 57.33                      | 75.70          | 423.00         | 3727.67          | 1707.00   | 2020.67         | 3641.00 | 1934.00      | 9.02                | 63.45         | 13.30 |
| BA7415                | DEU     | 1                                     | AWNLES S      | RED             | spelt type         | 2     | 5             | 5         | 1        | 74.07       | 46.24 | 3.23   | 7.73  | 58.91       | 20.25    | 53.07   | 6.54     | 44.22   | 6.50          | 57.97 | 37.67                 | 8.00            | 14.80                     | 41.33            | 56.80                      | 79.47          | 346.00         | 3629.00          | 1743.33   | 1885.67         | 3643.00 | 1899.67      | 9.13                | 63.13         | 13.57 |
| BA7418                | DEU     | 2                                     | AWNLES S      | WHITE           | spelt type         | 7     | 6             | 2         | 5        | 75.47       | 38.07 | 2.87   | 7.07  | 61.11       | 17.73    | 55.37   | 5.76     | 37.23   | 6.00          | 66.04 | 29.00                 | 7.47            | 8.77                      | 53.67            | 54.67                      | 65.93          | 406.67         | 3899.33          | 1793.00   | 2106.33         | 3844.67 | 2051.67      | 9.18                | 63.03         | 14.00 |
| BA7423                | DEU     | 1                                     | AWNLES S      | RED             | spelt type         | 8     | 5             | 6         | 6        | 75.10       | 39.14 | 2.97   | 7.30  | 61.57       | 18.73    | 52.67   | 6.61     | 43.77   | 7.00          | 75.70 | 46.33                 | 8.27            | 10.60                     | 68.67            | 57.87                      | 74.97          | 385.67         | 3782.00          | 1754.33   | 2027.67         | 3717.67 | 1963.33      | 9.02                | 62.93         | 11.00 |
| BA7424                | DEU     | 1                                     | AWNLES S      | RED             | spelt type         | 8     | 7             | 8         | 6        | 71.77       | 41.46 | 3.10   | 7.53  | 54.97       | 18.12    | 54.33   | 5.99     | 41.15   | 6.50          | 50.38 | 25.67                 | 5.90            | 6.23                      | 124.67           | 55.50                      | 53.83          | 380.67         | 3782.00          | 1699.33   | 2082.67         | 3706.00 | 2006.67      | 9.04                | 63.35         | 11.87 |
| BADENKRONE            | DEU     | 1                                     | AWNLES S      | RED             | spelt type         | 7     | 7             | 5         | 6        | 60.10       | 32.29 | 3.00   | 7.40  | 55.40       | 16.55    | 52.70   | 6.40     | 40.95   | 7.50          | 41.58 | 30.00                 | 0.55            | 6.25                      | 70.00            | 53.40                      | 27.10          | 327.00         | 3806.50          | 1721.00   | 2085.50         | 3792.00 | 2071.00      | 9.00                | 64.33         | 11.85 |
| BADENSONNE            | DEU     | 1                                     | AWNLES S      | RED             | spelt type         | 1     | 4             | 5         | 1        | 69.40       | 32.03 | 2.90   | 7.45  | 52.69       | 17.17    | 53.10   | 6.59     | 44.75   | 13.25         | 32.34 | 28.50                 | 3.35            | 15.85                     | 30.50            | 54.35                      | 78.50          | 407.50         | 3617.50          | 1723.00   | 1894.50         | 3756.50 | 2033.50      | 8.90                | 63.05         | 13.85 |
| BALMEGG               | CHE     | 1                                     | AWNLES S      | RED             | spelt type         | 8     | 1             | 6         | 6        | 74.53       | 35.29 | 3.03   | 6.97  | 54.91       | 19.66    | 52.57   | 6.92     | 49.02   | 6.83          | 67.06 | 39.30                 | 3.17            | 15.57                     | 47.00            | 56.73                      | 64.40          | 406.00         | 3825.67          | 1691.00   | 2134.67         | 3590.00 | 1899.00      | 9.11                | 63.63         | 13.23 |
| BLACK-BEARDED         | AUS     | 3                                     | AWN           | BROWN           | spelt type         | 6     | 7             | 4         | 8        | 70.90       | 34.77 | 2.75   | 7.05  | 59.59       | 18.86    | 52.55   | 6.19     | 38.73   | 4.25          | 97.46 | 52.67                 | 17.05           | 19.03                     | 5.00             | 57.10                      | 97.15          | 447.50         | 3880.50          | 1879.00   | 2001.50         | 4319.50 | 2440.50      | 9.10                | 65.08         | 11.45 |
| BOHEMIA               | CZ      | 3                                     | AWN           | BROWN           | spelt type         | 6     | 7             | 4         | 8        | 71.35       | 35.14 | 2.75   | 7.10  | 60.13       | 18.48    | 52.30   | 6.56     | 38.10   | 4.25          | 92.44 | 52.83                 | 14.05           | 18.60                     | 5.50             | 55.05                      | 88.25          | 485.00         | 3876.50          | 1942.50   | 1934.00         | 4272.50 | 2330.00      | 9.07                | 64.23         | 12.35 |
| CH65384               | CHE     | 2                                     | AWNLES S      | WHITE           | spelt type         | 7     | 6             | 3         | 5        | 76.50       | 38.47 | 2.90   | 7.00  | 62.41       | 17.10    | 55.73   | 6.00     | 36.48   | 6.67          | 63.80 | 28.67                 | 2.57            | 6.93                      | 90.00            | 53.43                      | 51.20          | 400.00         | 3908.00          | 1770.00   | 2138.00         | 3768.00 | 1998.00      | 9.13                | 62.80         | 12.57 |
| CH65388               | CHE     | 2                                     | AWNLES S      | WHITE           | spelt type         | 2     | 2             | 8         | 1        | 75.93       | 39.63 | 3.03   | 6.83  | 60.23       | 18.54    | 54.80   | 5.97     | 44.65   | 9.50          | 30.93 | 20.33                 | 1.87            | 2.43                      | 140.33           | 54.53                      | 26.63          | 390.33         | 3607.00          | 1685.00   | 1922.00         | 3667.00 | 1982.00      | 9.20                | 63.62         | 11.73 |
| COSMOS                | BEL     | 1                                     | AWNLES S      | RED             | spelt type         | 8     | 7             | 2         | 6        | 68.03       | 36.63 | 3.00   | 7.17  | 61.69       | 17.79    | 53.53   | 7.39     | 40.18   | 5.67          | 79.53 | 40.00                 | 3.30            | 7.57                      | 71.67            | 53.10                      | 59.10          | 387.67         | 3789.33          | 1681.33   | 2108.00         | 3774.67 | 2093.33      | 9.02                | 63.78         | 13.83 |
| D-7-004-99-01         | DEU     | 1                                     | AWNLES S      | RED             | spelt type         | 8     | 6             | 6         | 6        | 72.67       | 38.01 | 3.00   | 7.30  | 61.61       | 18.21    | 54.63   | 6.65     | 38.47   | 3.83          | 78.26 | 38.00                 | 1.97            | 14.97                     | 54.33            | 54.03                      | 62.93          | 340.33         | 3789.33          | 1710.33   | 2079.00         | 3687.00 | 1976.67      | 9.13                | 63.60         | 12.17 |
| D-7-004-99-02         | DEU     | 1                                     | AWNLES S      | RED             | spelt type         | 2     | 5             | 2         | 1        | 69.90       | 35.95 | 2.93   | 7.30  | 58.73       | 20.10    | 52.17   | 6.62     | 44.50   | 6.33          | 64.54 | 38.33                 | 4.60            | 9.43                      | 78.67            | 56.33                      | 62.47          | 386.00         | 3623.33          | 1664.33   | 1959.00         | 3625.00 | 1960.67      | 9.00                | 62.77         | 13.10 |
| D-7-005-99-01         | DEU     | 1                                     | AWNLES S      | RED             | spelt type         | 5     | 3             | 8         | 4        | 65.73       | 37.49 | 2.97   | 7.83  | 59.22       | 20.83    | 51.53   | 6.66     | 51.97   | 7.00          | 51.98 | 35.00                 | 3.33            | 6.83                      | 124.33           | 56.90                      | 52.83          | 319.00         | 3493.33          | 1669.33   | 1824.00         | 3636.67 | 1967.33      | 9.20                | 64.67         | 12.83 |
| D-7-005-99-04         | DEU     | 1                                     | AWNLES S      | RED             | spelt type         | 1     | 5             | 2         | 1        | 69.83       | 37.39 | 3.03   | 7.30  | 58.70       | 19.45    | 52.27   | 6.79     | 44.65   | 7.17          | 65.85 | 36.67                 | 3.57            | 13.93                     | 61.67            | 55.90                      | 64.27          | 382.00         | 3637.00          | 1727.33   | 1909.67         | 3798.33 | 2071.00      | 9.13                | 63.35         | 12.30 |
| D-7-005-99-06         | DEU     | 1                                     | AWNLES S      | RED             | spelt type         | 2     | 5             | 1         | 1        | 71.07       | 39.42 | 3.03   | 7.40  | 57.37       | 19.96    | 52.83   | 6.64     | 44.77   | 9.17          | 54.41 | 31.33                 | 2.40            | 7.20                      | 80.33            | 56.37                      | 53.70          | 365.67         | 3636.67          | 1670.00   | 1966.67         | 3697.67 | 2027.67      | 9.09                | 63.20         | 13.60 |
| D-7-010-99-02         | DEU     | 1                                     | AWNLES S      | RED             | spelt type         | 4     | 7             | 2         | 3        | 69.77       | 36.28 | 2.83   | 7.53  | 58.41       | 19.41    | 52.97   | 5.62     | 39.02   | 5.50          | 70.52 | 34.00                 | 2.70            | 5.73                      | 79.67            | 52.90                      | 55.27          | 378.00         | 3596.67          | 1763.00   | 1833.67         | 4005.00 | 2242.00      | 9.07                | 63.65         | 13.67 |
| D-7-014-98-01         | DEU     | 1                                     | AWNLES S      | RED             | spelt type         | 4     | 5             | 6         | 3        | 67.13       | 36.10 | 3.03   | 7.37  | 58.33       | 19.38    | 52.23   | 6.35     | 44.73   | 6.50          | 72.81 | 41.00                 | 2.53            | 14.93                     | 42.33            | 55.97                      | 65.73          | 391.00         | 3739.67          | 1772.00   | 1967.67         | 3897.67 | 2125.67      | 9.20                | 64.17         | 12.73 |
| D-7-014-99-02         | DEU     | 1                                     | AWNLES S      | RED             | spelt type         | 4     | 5             | 5         | 3        | 67.90       | 35.57 | 3.00   | 7.33  | 58.77       | 20.08    | 52.53   | 6.76     | 43.65   | 4.83          | 74.13 | 42.00                 | 12.60           | 17.40                     | 24.33            | 55.00                      | 84.37          | 412.33         | 3744.00          | 1753.67   | 1990.33         | 3848.67 | 2095.00      | 9.13                | 63.12         | 11.00 |
| D-7-014-99-03         | DEU     | 1                                     | AWNLES S      | RED             | spelt type         | 6     | 6             | 2         | 7        | 69.37       | 32.89 | 2.90   | 6.97  | 59.05       | 18.96    | 53.00   | 6.71     | 37.38   | 2.50          | 86.57 | 42.67                 | 2.67            | 12.17                     | 71.00            | 52.90                      | 48.93          | 399.33         | 3809.33          | 1829.33   | 1980.00         | 4091.33 | 2262.00      | 9.00                | 63.28         | 11.83 |
| D-7-019-99-02         | DEU     | 1                                     | AWNLES S      | RED             | spelt type         | 7     | 4             | 2         | 5        | 70.50       | 37.43 | 2.90   | 7.50  | 60.02       | 18.20    | 53.60   | 6.93     | 42.68   | 4.67          | 65.99 | 34.00                 | 2.97            | 8.00                      | 74.67            | 55.67                      | 59.33          | 380.33         | 3894.33          | 1700.00   | 2194.33         | 3770.33 | 2070.33      | 9.09                | 63.13         | 13.80 |
| DUHAMELIANUM          | AUS     | 1                                     | AWNLES S      | RED             | spelt type         | 3     | 2             | 7         | 1        | 76.45       | 38.17 | 2.87   | 7.30  | 57.09       | 18.35    | 52.77   | 6.61     | 46.83   | 8.83          | 50.88 | 31.33                 | 3.20            | 5.83                      | 91.67            | 56.77                      | 52.83          | 442.33         | 3522.33          | 1748.00   | 1774.33         | 3804.33 | 2056.33      | 9.11                | 62.45         | 13.63 |
| DUHAMELIANUM-MAZZ     | AUS     | 6                                     | AWNLES S      | GREY            | spelt type         | 6     | 4             | 6         | 7        | 74.00       | 33.78 | 2.83   | 6.90  | 57.57       | 17.06    | 53.33   | 7.47     | 44.08   | 7.33          | 77.55 | 42.00                 | 9.97            | 13.93                     | 41.00            | 62.50                      | 76.97          | 520.00         | 4104.33          | 1887.33   | 2217.00         | 4030.33 | 2143.00      | 8.84                | 61.65         | 18.00 |
| EBNERS-ROTKORN        | DEU     | 1                                     | AWNLES S      | RED             | spelt type         | 5     | 3             | 7         | 4        | 69.70       | 39.07 | 2.95   | 7.60  | 57.13       | 18.45    | 52.40   | 6.95     | 54.25   | 16.25         | 25.08 | 28.00                 | 2.60            | 7.60                      | 90.50            | 57.15                      | 55.65          | 307.50         | 3292.50          | 1535.50   | 1757.00         | 3381.50 | 1846.00      | 9.03                | 62.73         | 12.75 |
| FRANCKENKORN          | DEU     | 1                                     | AWNLES S      | RED             | spelt type         | 8     | 7             | 2         | 6        | 67.93       | 37.81 | 3.00   | 7.53  | 60.98       | 19.20    | 52.77   | 6.70     | 41.13   | 7.00          | 76.69 | 37.67                 | 3.07            | 10.90                     | 68.67            | 53.90                      | 63.33          | 397.00         | 3782.67          | 1668.67   | 2114.00         | 3715.67 | 2047.00      | 9.02                | 64.13         | 11.13 |
| GEOFFS-RED-SPELT      | AUS     | 1                                     | AWNLES S      | RED             | spelt type         | 1     | 2             | 5         | 1        | 68.43       | 33.29 | 2.73   | 7.33  | 57.66       | 20.61    | 51.50   | 6.22     | 47.48   | 5.33          | 69.31 | 42.33                 | 9.30            | 12.87                     | 47.67            | 57.07                      | 76.43          | 398.33         | 3623.67          | 1715.00   | 1908.67         | 3802.67 | 2087.67      | 9.13                | 64.62         | 12.97 |
| GEOFFS-WHITE-SPELT    | AUS     | 2                                     | AWNLES S      | WHITE           | spelt type         | 7     | 6             | 6         | 5        | 73.43       | 32.10 | 2.73   | 6.73  | 57.02       | 17.74    | 54.50   | 7.14     | 35.88   | 4.33          | 87.83 | 33.67                 | 9.73            | 15.43                     | 51.67            | 53.60                      | 74.00          | 392.33         | 3847.67          | 1714.33   | 2133.33         | 3724.67 | 2010.33      | 9.04                | 64.50         | 13.50 |
| HERCULE               | BEL     | 2                                     | AWNLES S      | WHITE           | spelt type         | 4     | 2             | 8         | 3        | 67.90       | 33.03 | 2.87   | 7.10  | 60.69       | 18.30    | 53.03   | 6.21     | 46.45   | 16.50         | 11.86 | 17.00                 | 0.80            | 0.73                      | 216.67           | 55.60                      | 0.00           | 343.00         | 3545.67          | 1594.33   | 1951.33         | 3800.00 | 2205.67      | 9.02                | 63.82         | 11.23 |
| HOLSTENKORN           | DEU     | 1                                     | AWNLES S      | RED             | spelt type         | 4     | 1             | 8         | 3        | 65.70       | 32.03 | 2.73   | 7.27  | 59.10       | 18.58    | 52.70   | 6.93     | 49.02   | 8.17          | 52.60 | 31.33                 | 2.30            | 4.20                      | 109.67           | 53.93                      | 35.03          | 425.00         | 3619.33          | 1653.00   | 1966.33         | 3870.00 | 2217.00      | 9.04                | 64.65         | 12.63 |
| HUBEL                 | CHE     | 1                                     | AWNLES S      | RED             | spelt type         | 8     | 7             | 3         | 6        | 73.77       | 36.12 | 3.00   | 6.97  | 62.45       | 18.05    | 53.93   | 6.29     | 41.35   | 6.33          | 68.25 | 35.67                 | 4.03            | 5.73                      | 118.67           | 52.80                      | 50.83          | 385.00         | 3734.67          | 1673.33   | 2061.33         | 3557.00 | 1883.67      | 9.13                | 64.87         | 9.93  |
| LUEG                  | CHE     | 1                                     | AWNLES S      | RED             | spelt type         | 1     | 4             | 6         | 1        | 66.90       | 28.01 | 2.85   | 6.50  | 53.87       | 18.99    | 51.15   | 6.11     | 42.13   | 8.50          | 60.08 | 41.50                 | 4.10            | 13.45                     | 52.00            | 54.65                      | 71.60          | 346.50         | 3599.00          | 1760.50   | 18              |         |              |                     |               |       |

|                                  |     |   |             |       |            |   |   |   |   |       |       |      |      |       |       |       |      |       |       |           |       |       |        |       |       |        |         |         |         |         |         |      |         |       |
|----------------------------------|-----|---|-------------|-------|------------|---|---|---|---|-------|-------|------|------|-------|-------|-------|------|-------|-------|-----------|-------|-------|--------|-------|-------|--------|---------|---------|---------|---------|---------|------|---------|-------|
| MVGB141                          | HUN | 4 | AWN         | RED   | spelt type | 7 | 2 | 2 | 5 | 64.00 | 33.19 | 2.73 | 7.30 | 57.12 | 19.57 | 52.47 | 6.48 | 46.87 | 7.50  | 59.37.085 | 2.55  | 7.50  | 73.00  | 55.80 | 59.65 | 445.00 | 3984.50 | 1893.50 | 2091.00 | 3910.50 | 2017.00 | 9.08 | 64.58   | 13.05 |
| MVGB142                          | HUN | 6 | AWNLES<br>S | GREY  | spelt type | 4 | 5 | 4 | 3 | 69.33 | 29.51 | 2.70 | 6.63 | 58.12 | 20.41 | 51.20 | 5.28 | 44.57 | 3.83  | 84.49.090 | 9.60  | 16.10 | 32.67  | 56.43 | 83.97 | 351.67 | 3621.00 | 1721.33 | 1899.67 | 3957.67 | 2236.33 | 8.96 | 63.35   | 13.40 |
| MVGB143                          | HUN | 4 | AWN         | RED   | spelt type | 4 | 4 | 6 | 3 | 63.80 | 29.63 | 2.63 | 7.13 | 55.89 | 19.52 | 52.30 | 6.16 | 42.78 | 6.25  | 65.39.026 | 2.70  | 11.05 | 44.50  | 55.70 | 64.10 | 439.00 | 3689.00 | 1740.50 | 1948.50 | 3923.00 | 2182.50 | 8.93 | 62.73   | 11.90 |
| MVGB144                          | HUN | 2 | AWNLES<br>S | WHITE | spelt type | 7 | 7 | 3 | 5 | 72.10 | 34.72 | 3.03 | 6.53 | 60.90 | 18.85 | 53.60 | 6.46 | 39.52 | 4.00  | 76.39.078 | 1.50  | 6.17  | 101.00 | 53.50 | 43.23 | 406.33 | 3886.67 | 1749.33 | 2137.33 | 3830.67 | 2081.33 | 9.02 | 64.18   | 11.40 |
| MVGB145                          | HUN | 4 | AWN         | RED   | spelt type | 6 | 4 | 5 | 7 | 64.75 | 28.22 | 2.60 | 7.00 | 57.55 | 19.20 | 52.45 | 6.54 | 42.10 | 6.25  | 66.43.068 | 6.85  | 17.00 | 30.00  | 55.20 | 77.00 | 439.67 | 3865.00 | 1795.00 | 2070.00 | 4029.00 | 2234.00 | 9.07 | 63.48   | 13.40 |
| MVGB146                          | HUN | 5 | AWN         | WHITE | spelt type | 3 | 2 | 1 | 2 | 70.07 | 30.88 | 2.60 | 7.13 | 56.12 | 21.11 | 50.97 | 6.03 | 46.07 | 6.50  | 35.33.314 | 5.50  | 11.73 | 64.33  | 57.33 | 69.47 | 385.33 | 3457.00 | 1744.00 | 1713.00 | 3821.50 | 2077.50 | 9.00 | 63.03   | 13.90 |
| MVGB308                          | HUN | 2 | AWNLES<br>S | WHITE | spelt type | 6 | 6 | 8 | 8 | 75.63 | 41.22 | 3.37 | 6.50 | 62.38 | 16.20 | 56.03 | 7.90 | 33.42 | 7.17  | 27.26.622 | 2.67  | 4.23  | 125.00 | 54.50 | 42.47 | 269.33 | 3899.67 | 1960.33 | 1939.33 | 4153.67 | 2193.33 | 9.16 | 63.82   | 12.23 |
| MVGB318                          | HUN | 1 | AWNLES<br>S | RED   | spelt type | 6 | 3 | 7 | 7 | 68.40 | 37.56 | 3.00 | 7.70 | 56.27 | 19.92 | 52.30 | 6.24 | 50.83 | 7.67  | 46.30.362 | 1.67  | 4.10  | 104.00 | 57.23 | 46.17 | 340.00 | 3815.00 | 1815.67 | 1999.33 | 3974.33 | 2158.67 | 9.13 | 63.65   | 12.33 |
| MVGB319                          | HUN | 4 | AWN         | RED   | spelt type | 4 | 5 | 2 | 3 | 71.37 | 31.59 | 2.70 | 7.13 | 58.22 | 19.88 | 52.37 | 6.92 | 45.55 | 7.83  | 70.43.342 | 3.57  | 12.63 | 65.00  | 55.83 | 64.37 | 454.67 | 3748.67 | 1810.33 | 1938.33 | 3899.00 | 2088.67 | 9.20 | 64.80   | 10.17 |
| MVGB353                          | HUN | 1 | AWNLES<br>S | RED   | spelt type | 8 | 4 | 4 | 6 | 71.53 | 34.34 | 2.73 | 7.47 | 53.42 | 20.11 | 52.33 | 6.91 | 42.03 | 4.50  | 81.44.664 | 13.90 | 13.97 | 33.00  | 56.77 | 82.73 | 391.33 | 3816.33 | 1754.33 | 2062.00 | 3684.00 | 1929.67 | 9.07 | 63.80   | 13.53 |
| MVGB523                          | HUN | 2 | AWNLES<br>S | WHITE | spelt type | 7 | 4 | 5 | 5 | 72.17 | 37.23 | 2.80 | 7.53 | 53.31 | 19.89 | 52.27 | 6.57 | 43.10 | 6.50  | 65.33.626 | 12.53 | 14.87 | 36.00  | 56.63 | 83.47 | 444.67 | 3849.00 | 1740.00 | 2109.00 | 3693.00 | 1953.00 | 9.00 | 63.33   | 14.03 |
| MVGB524                          | HUN | 3 | AWN         | BROWN | spelt type | 6 | 4 | 4 | 7 | 70.85 | 33.01 | 2.75 | 7.05 | 62.15 | 19.54 | 51.85 | 6.31 | 42.83 | 4.00  | 87.53.578 | 6.95  | 18.85 | 14.00  | 56.75 | 85.25 | 412.50 | 3808.00 | 1876.00 | 1932.00 | 4100.50 | 2224.50 | 9.03 | 63.95   | 11.20 |
| MVGB525                          | HUN | 3 | AWN         | BROWN | spelt type | 4 | 5 | 4 | 3 | 66.00 | 33.34 | 2.80 | 7.15 | 59.19 | 19.90 | 51.30 | 6.15 | 44.13 | 4.50  | 92.57.023 | 6.45  | 18.70 | 18.00  | 57.65 | 82.95 | 438.50 | 3629.00 | 1831.00 | 1798.00 | 4124.00 | 2293.00 | 9.17 | 65.50   | 10.10 |
| MVGB526                          | HUN | 5 | AWN         | WHITE | spelt type | 3 | 3 | 1 | 2 | 72.35 | 33.14 | 2.70 | 7.15 | 59.10 | 20.93 | 51.65 | 6.15 | 53.80 | 10.50 | 48.35.048 | 8.40  | 10.30 | 74.50  | 57.00 | 69.50 | 381.00 | 3506.50 | 1780.50 | 1726.00 | 3989.50 | 2209.00 | 8.93 | 62.00   | 13.35 |
| MVGB527                          | HUN | 1 | AWNLES<br>S | RED   | spelt type | 4 | 5 | 6 | 3 | 70.67 | 36.99 | 2.90 | 7.60 | 58.12 | 19.85 | 52.33 | 6.42 | 45.05 | 5.50  | 67.41.072 | 8.47  | 14.77 | 50.00  | 56.50 | 73.37 | 381.67 | 3727.00 | 1751.67 | 1975.33 | 3828.33 | 2076.67 | 9.07 | 62.82   | 14.30 |
| MVGB528                          | HUN | 2 | AWNLES<br>S | WHITE | spelt type | 7 | 5 | 5 | 7 | 69.63 | 36.32 | 2.77 | 7.63 | 51.13 | 20.46 | 51.57 | 6.45 | 44.32 | 7.83  | 64.36.615 | 11.83 | 13.07 | 39.33  | 57.40 | 76.87 | 413.67 | 3849.67 | 1768.67 | 2081.00 | 3902.00 | 2133.33 | 9.00 | 63.83   | 13.47 |
| MVGB529                          | HUN | 5 | AWN         | WHITE | spelt type | 3 | 2 | 6 | 2 | 71.13 | 31.46 | 2.67 | 7.03 | 55.94 | 20.29 | 51.70 | 5.85 | 48.30 | 8.17  | 57.36.042 | 8.83  | 12.53 | 57.00  | 57.17 | 74.73 | 391.67 | 3545.67 | 1787.33 | 1758.33 | 3938.67 | 2151.33 | 9.00 | 63.02   | 13.57 |
| MVGB557                          | HUN | 2 | AWNLES<br>S | WHITE | spelt type | 6 | 7 | 3 | 7 | 69.20 | 33.76 | 2.97 | 6.90 | 62.75 | 18.51 | 52.97 | 5.98 | 41.37 | 5.17  | 84.42.042 | 2.53  | 6.47  | 84.00  | 54.77 | 51.30 | 308.33 | 3814.67 | 1848.00 | 1966.67 | 3984.33 | 2136.33 | 9.22 | 63.82   | 10.93 |
| MVGB855                          | HUN | 5 | AWN         | WHITE | spelt type | 6 | 6 | 8 | 7 | 77.20 | 38.40 | 3.10 | 6.40 | 55.27 | 15.86 | 55.30 | 7.08 | 37.95 | 6.50  | 52.26.361 | 2.57  | 4.40  | 119.67 | 55.27 | 46.07 | 368.33 | 3796.00 | 1853.33 | 1942.67 | 3973.33 | 2120.00 | 9.16 | 62.80   | 12.13 |
| MV-MARTONGOLD                    | HUN | 1 | AWNLES<br>S | RED   | spelt type | 5 | 2 | 6 | 4 | 77.33 | 42.48 | 3.13 | 7.40 | 57.15 | 18.24 | 54.47 | 5.89 | 46.60 | 10.50 | 54.31.014 | 3.43  | 12.43 | 49.67  | 57.30 | 65.67 | 371.33 | 3512.33 | 1651.00 | 1861.33 | 3532.33 | 1881.33 | 9.09 | 62.98   | 13.13 |
| MV-VITALGOLD                     | HUN | 1 | AWNLES<br>S | RED   | spelt type | 5 | 1 | 8 | 4 | 70.57 | 42.63 | 3.10 | 7.83 | 58.86 | 19.38 | 53.30 | 6.24 | 49.92 | 13.50 | 22.25.387 | 1.43  | 2.67  | 127.67 | 56.33 | 36.03 | 363.33 | 3486.33 | 1678.33 | 1808.00 | 3628.00 | 1949.67 | 9.16 | 63.47   | 11.97 |
| OBERKULMER/BAU<br>LANDER-SPELZ_1 | HUN | 1 | AWNLES<br>S | RED   | spelt type | 2 | 3 | 8 | 1 | 71.33 | 42.54 | 3.03 | 7.93 | 60.98 | 20.57 | 52.27 | 6.24 | 53.82 | 12.50 | 39.27.694 | 2.50  | 5.17  | 118.00 | 58.93 | 48.20 | 345.33 | 3595.00 | 1717.50 | 1877.50 | 3718.50 | 2001.00 | 9.18 | 62.65   | 13.20 |
| OBERKULMER/BAU<br>LANDER-SPELZ_2 | HUN | 1 | AWNLES<br>S | RED   | spelt type | 1 | 1 | 1 | 1 | 68.47 | 40.03 | 2.97 | 7.83 | 59.86 | 19.87 | 52.93 | 6.05 | 48.83 | 6.17  | 54.33.682 | 2.57  | 6.23  | 81.33  | 55.87 | 55.27 | 411.67 | 3548.67 | 1685.67 | 1863.00 | 3719.67 | 2034.00 | 9.09 | 63.60   | 12.53 |
| OBERKULMER/ROU<br>QUIN           | HUN | 1 | AWNLES<br>S | RED   | spelt type | 5 | 1 | 7 | 4 | 69.93 | 41.38 | 3.03 | 7.67 | 55.40 | 19.57 | 53.50 | 5.95 | 49.07 | 10.83 | 44.26.088 | 2.43  | 5.60  | 104.33 | 56.43 | 49.83 | 368.33 | 3379.33 | 1606.00 | 1773.33 | 3655.00 | 2049.00 | 9.09 | 63.17   | 13.53 |
| OBERKULMER/SCH<br>WABENKORN_1    | HUN | 1 | AWNLES<br>S | RED   | spelt type | 5 | 3 | 7 | 4 | 72.03 | 41.03 | 2.97 | 7.83 | 58.99 | 20.43 | 52.37 | 6.55 | 52.98 | 9.33  | 47.27.044 | 2.73  | 6.73  | 95.33  | 57.90 | 55.17 | 374.00 | 3470.67 | 1691.67 | 1779.00 | 3709.33 | 2017.67 | 9.11 | 62.85   | 12.37 |
| OBERKULMER/SCH<br>WABENKORN_2    | HUN | 1 | AWNLES<br>S | RED   | spelt type | 3 | 1 | 8 | 2 | 71.53 | 43.02 | 3.00 | 7.97 | 57.74 | 19.88 | 53.03 | 6.85 | 49.65 | 7.17  | 38.26.392 | 1.83  | 3.97  | 110.67 | 56.87 | 42.50 | 353.33 | 3419.33 | 1698.00 | 1721.33 | 3813.67 | 2115.67 | 9.13 | 62.47   | 14.37 |
| OBERKULMER/SCH<br>WABENKORN_3    | HUN | 1 | AWNLES<br>S | RED   | spelt type | 4 | 1 | 7 | 3 | 71.13 | 46.91 | 3.03 | 8.03 | 57.80 | 19.34 | 54.03 | 6.86 | 49.20 | 5.67  | 35.25.339 | 2.70  | 5.73  | 91.00  | 56.13 | 53.97 | 359.67 | 3592.00 | 1779.00 | 1813.00 | 3891.33 | 2112.33 | 9.18 | 62.97   | 14.43 |
| OBERKULMER/SCH<br>WABENKORN_4    | HUN | 1 | AWNLES<br>S | RED   | spelt type | 7 | 5 | 1 | 5 | 70.80 | 41.08 | 3.03 | 7.57 | 56.68 | 19.50 | 52.67 | 7.84 | 43.67 | 8.83  | 54.30.650 | 3.63  | 10.97 | 75.33  | 55.43 | 60.27 | 396.33 | 3840.67 | 1751.67 | 2089.00 | 3815.33 | 2063.67 | 9.09 | 63.15   | 13.13 |
| OBERKULMER/SCH<br>WABENKORN_5    | HUN | 1 | AWNLES<br>S | RED   | spelt type | 3 | 1 | 7 | 2 | 71.97 | 45.19 | 3.07 | 7.97 | 57.92 | 19.91 | 53.03 | 6.96 | 49.72 | 11.50 | 44.31.087 | 2.53  | 5.00  | 99.67  | 57.37 | 50.63 | 353.67 | 3418.67 | 1738.33 | 1680.33 | 3778.67 | 2040.33 | 9.16 | 61.93   | 13.80 |
| OBERKULMER/SER<br>TEL_1          | HUN | 1 | AWNLES<br>S | RED   | spelt type | 4 | 1 | 8 | 3 | 72.03 | 42.86 | 3.03 | 7.80 | 60.32 | 19.66 | 53.30 | 6.17 | 48.78 | 6.33  | 51.29.368 | 1.67  | 4.23  | 119.33 | 56.87 | 41.30 | 375.33 | 3622.00 | 1756.67 | 1865.33 | 3912.33 | 2155.67 | 9.09 | 62.95   | 13.60 |
| OBERKULMER/SER<br>TEL_2          | HUN | 1 | AWNLES<br>S | RED   | spelt type | 4 | 5 | 2 | 3 | 73.00 | 41.74 | 3.00 | 7.83 | 60.71 | 19.73 | 53.50 | 6.78 | 43.92 | 5.00  | 69.36.312 | 4.80  | 11.10 | 69.00  | 56.23 | 66.43 | 398.33 | 3566.33 | 1719.67 | 1846.67 | 3885.67 | 2166.00 | 9.13 | 63.17   | 13.53 |
| OBERKULMER-<br>ROTKORN           | CHE | 1 | AWNLES<br>S | RED   | spelt type | 5 | 3 | 7 | 4 | 72.53 | 45.07 | 3.07 | 7.83 | 60.65 | 19.89 | 53.47 | 6.54 | 54.27 | 9.33  | 39.28.336 | 2.30  | 5.00  | 99.67  | 57.47 | 51.17 | 319.67 | 3327.67 | 1619.33 | 1708.33 | 3566.33 | 1947.00 | 9.16 | 62.68   | 13.27 |
| OKO-10                           | HUN | 1 | AWNLES<br>S | RED   | spelt type | 5 | 3 | 8 | 4 | 71.67 | 43.37 | 3.00 | 7.73 | 56.43 | 18.77 | 53.40 | 6.95 | 52.87 | 14.33 | 26.24.330 | 1.80  | 2.90  | 118.33 | 57.53 | 41.23 | 311.33 | 3347.67 | 1616.67 | 1731.00 | 3599.00 | 1982.33 | 9.11 | 62.00   | 13.80 |
| OSTAR                            | CHE | 1 | AWNLES<br>S | RED   | spelt type | 4 | 5 | 7 | 3 | 69.53 | 42.01 | 3.13 | 7.80 | 56.68 | 19.39 | 52.83 | 6.75 | 44.45 | 7.50  | 47.30.620 | 3.30  | 5.47  | 86.00  | 54.63 | 48.07 | 336.00 | 3688.00 | 1829.67 | 1858.33 | 3926.67 | 2097.00 | 9.16 | 63.10   | 13.00 |
| OSTRO                            | CHE | 1 | AWNLES<br>S | RED   | spelt type | 5 | 1 | 8 | 3 | 71.60 | 44.49 | 3.00 | 7.90 | 58.52 | 19.37 | 52.97 | 6.76 | 49.12 | 13.67 | 25.23.027 | 2.57  | 3.93  | 125.00 | 57.70 | 44.47 | 353.33 | 3436.33 | 1704.00 | 1732.33 | 3630.67 | 1926.67 | 9.13 | 62.13   | 13.97 |
| POEME                            | BEL | 1 | AWNLES<br>S | RED   | spelt type | 2 | 5 | 6 | 1 | 69.43 | 35.16 | 2.97 | 7.37 | 62.61 | 19.04 | 52.17 | 6.99 | 45.18 | 8.83  | 56.35.099 | 4.47  | 14.53 | 49.00  | 54.70 | 70.10 | 385.67 | 3605.00 | 1642.00 | 1963.00 | 3665.67 | 2023.67 | 9.09 | 63.35   | 12.10 |
| RED WINTER                       | AUS | 1 | AWNLES<br>S | RED   | spelt type | 1 | 5 | 6 | 1 | 69.60 | 33.00 | 2.77 | 7.37 | 56.11 | 19.72 | 51.93 | 6.44 | 45.85 | 6.33  | 71.41.098 | 6.87  | 14.47 | 51.33  | 56.57 | 74.37 | 457.00 | 3612.33 | 1699.67 | 1912.67 | 3735.67 | 2036.00 | 9.11 | 63.97</ |       |

|                 |     |   |             |       |            |   |   |   |   |       |       |       |      |       |       |       |       |       |        |       |       |        |       |        |       |        |        |         |         |         |         |         |      |       |       |
|-----------------|-----|---|-------------|-------|------------|---|---|---|---|-------|-------|-------|------|-------|-------|-------|-------|-------|--------|-------|-------|--------|-------|--------|-------|--------|--------|---------|---------|---------|---------|---------|------|-------|-------|
| SAHARENSE       | AUS | 7 | AWNLES<br>S | GREY  | wheat type | 6 | 6 | 3 | 8 | 72.07 | 32.31 | 2.87  | 6.20 | 62.23 | 14.87 | 54.53 | 6.75  | 38.65 | 10.50  | 69.28 | 63.0  | 4.63   | 6.50  | 88.33  | 58.67 | 58.77  | 416.00 | 4009.67 | 2075.67 | 1934.00 | 4533.00 | 2457.33 | 8.93 | 62.10 | 14.83 |
| SCHWABENKORN    | DEU | 1 | AWNLES<br>S | RED   | spelt type | 4 | 6 | 1 | 3 | 70.53 | 36.77 | 3.00  | 6.97 | 60.93 | 16.25 | 55.13 | 6.95  | 39.53 | 10.00  | 49.26 | 71.3  | 2.67   | 4.37  | 73.67  | 53.27 | 56.93  | 383.00 | 3670.00 | 1751.67 | 1918.33 | 3893.67 | 2142.00 | 9.07 | 64.30 | 14.83 |
| SERTEL          | CHE | 2 | AWNLES<br>S | WHITE | spelt type | 7 | 6 | 3 | 5 | 76.37 | 38.52 | 2.93  | 7.00 | 63.14 | 17.39 | 55.43 | 5.65  | 39.02 | 7.17   | 73.31 | 04.0  | 2.73   | 5.77  | 85.00  | 53.10 | 51.40  | 389.00 | 3933.67 | 1776.33 | 2157.33 | 3733.67 | 1957.33 | 9.18 | 62.98 | 11.73 |
| SPY             | BEL | 1 | AWNLES<br>S | RED   | spelt type | 7 | 4 | 1 | 5 | 68.00 | 39.52 | 3.20  | 7.53 | 56.87 | 17.97 | 53.40 | 6.07  | 44.40 | 7.17   | 53.29 | 71.0  | 7.97   | 9.90  | 73.67  | 55.17 | 63.33  | 343.33 | 3918.67 | 1797.67 | 2121.00 | 3877.33 | 2079.67 | 9.09 | 63.80 | 11.97 |
| STONE           | BEL | 1 | AWNLES<br>S | RED   | spelt type | 8 | 5 | 6 | 6 | 68.10 | 37.50 | 3.07  | 7.33 | 57.60 | 19.31 | 52.10 | 6.92  | 44.18 | 7.83   | 58.37 | 43.0  | 4.67   | 13.23 | 60.33  | 55.77 | 66.57  | 412.33 | 3743.50 | 1653.00 | 2090.50 | 3720.50 | 2067.50 | 9.10 | 64.00 | 13.15 |
| TSP04-09        | HUN | 1 | AWNLES<br>S | RED   | spelt type | 8 | 2 | 2 | 3 | 69.47 | 35.49 | 2.90  | 7.53 | 56.36 | 20.66 | 51.57 | 7.14  | 46.90 | 7.33   | 63.32 | 27.7  | 4.50   | 10.97 | 64.00  | 56.73 | 65.30  | 407.67 | 3715.67 | 1705.00 | 2010.67 | 3782.33 | 2077.33 | 9.09 | 63.82 | 13.50 |
| TSP06-10        | HUN | 1 | AWNLES<br>S | RED   | spelt type | 1 | 1 | 7 | 1 | 70.93 | 40.84 | 3.03  | 7.67 | 58.78 | 19.49 | 52.83 | 6.61  | 49.73 | 11.83  | 35.27 | 59.0  | 2.67   | 7.03  | 96.33  | 56.87 | 50.50  | 416.33 | 3624.00 | 1735.67 | 1888.33 | 3829.00 | 2093.33 | 9.09 | 62.80 | 12.50 |
| TSP07-09        | HUN | 1 | AWNLES<br>S | RED   | spelt type | 6 | 1 | 7 | 6 | 68.20 | 36.56 | 2.97  | 7.70 | 56.54 | 20.03 | 52.23 | 6.58  | 48.88 | 10.33  | 39.30 | 99.0  | 2.27   | 7.73  | 86.67  | 57.37 | 54.27  | 361.67 | 3871.00 | 1828.33 | 2042.67 | 3947.33 | 2119.00 | 9.13 | 63.80 | 13.10 |
| VAVILOVII       | AUS | 5 | AWN         | WHITE | spelt type | 6 | 6 | 8 | 8 | 75.20 | 35.33 | 3.07  | 6.40 | 53.31 | 14.51 | 56.30 | 6.11  | 33.23 | 9.25   | 57.29 | 25.7  | 1.80   | 4.55  | 127.00 | 54.25 | 39.90  | 251.33 | 3979.50 | 2092.50 | 1887.00 | 4259.00 | 2166.50 | 9.27 | 64.78 | 10.90 |
| VULPINUM ALEF.  | AUS | 4 | AWN         | RED   | spelt type | 6 | 7 | 3 | 6 | 73.90 | 44.79 | 3.10  | 7.70 | 58.45 | 16.96 | 54.20 | 6.48  | 41.23 | 6.83   | 73.41 | 79.0  | 3.30   | 9.83  | 80.67  | 56.63 | 61.83  | 347.33 | 3894.67 | 1892.00 | 2002.67 | 3942.33 | 2050.33 | 9.16 | 63.83 | 13.97 |
| WEIHENSTEPHAN   | HUN | 2 | AWNLES<br>S | WHITE | spelt type | 6 | 4 | 8 | 8 | 69.50 | 32.98 | 2.97  | 6.60 | 60.99 | 17.64 | 53.53 | 6.51  | 43.02 | 10.33  | 61.36 | 51.0  | 2.10   | 5.47  | 128.00 | 55.37 | 34.73  | 286.00 | 3955.67 | 1958.67 | 1997.00 | 4086.00 | 2127.33 | 9.22 | 64.32 | 7.60  |
| WHITE BEARDLESS | AUS | 2 | AWNLES<br>S | WHITE | spelt type | 7 | 6 | 4 | 5 | 72.77 | 32.03 | 2.73  | 6.77 | 57.56 | 18.10 | 53.97 | 7.35  | 37.25 | 2.67   | 91.39 | 81.7  | 7.63   | 16.00 | 29.67  | 54.43 | 80.67  | 398.67 | 4011.33 | 1753.67 | 2257.67 | 3714.67 | 1961.00 | 9.02 | 64.70 | 13.50 |
| ZOLLERNPELZ     | DEU | 1 | AWNLES<br>S | RED   | spelt type | 2 | 3 | 1 | 1 | 64.95 | 33.42 | 2.85  | 7.50 | 59.34 | 18.36 | 51.40 | 6.33  | 50.50 | 5.50   | 60.40 | 593.0 | 2.45   | 7.25  | 80.00  | 56.70 | 51.90  | 425.00 | 3618.50 | 1618.50 | 2000.00 | 3656.50 | 2038.00 | 8.93 | 62.38 | 12.65 |
| GLENLEA         | CAN | 8 | AWNLES<br>S | WHITE | wheat type | 8 | 6 | 4 | 6 | 79.57 | 42.63 | 3.24  | 7.08 | 60.17 | 16.30 | 55.73 | 5.95  | 35.97 | 2.50   | 97.48 | 32.0  | 19.87  | 17.47 | 45.00  | 62.90 | 100.00 | 416.00 | 3817.00 | 1783.67 | 2033.33 | 3528.00 | 1744.33 | 8.96 | 61.60 | 17.35 |
| UKRAINKA        | UKR | 9 | AWN         | WHITE | wheat type | 6 | 6 | 4 | 8 | 75.60 | 38.31 | 3.18  | 6.70 | 54.72 | 14.53 | 55.57 | 6.79  | 28.90 | 1.17   | 99.45 | 70.7  | 1.94   | 18.17 | 30.33  | 60.00 | 76.90  | 428.00 | 3939.00 | 2072.00 | 1867.00 | 4157.00 | 2085.00 | 8.91 | 61.17 | 18.85 |
| mean of spelt   |     |   |             |       |            |   |   |   |   | 70.51 | 36.93 | 2.93  | 7.32 | 58.22 | 18.99 | 52.94 | 6.54  | 44.71 | 7.80   | 59.34 | 28.8  | 4.75   | 9.54  | 76.06  | 55.95 | 59.73  | 383.28 | 3706.24 | 1751.42 | 1954.81 | 3824.95 | 2073.53 | 9.08 | 63.48 | 12.75 |
| sd of spelt     |     |   |             |       |            |   |   |   |   | 3.28  | 4.25  | 0.15  | 0.41 | 2.58  | 1.32  | 1.16  | 0.47  | 4.78  | 2.95   | 18.08 | 7.54  | 3.46   | 4.71  | 35.24  | 1.62  | 16.22  | 44.64  | 177.15  | 95.24   | 137.52  | 187.53  | 116.40  | 0.08 | 0.80  | 1.38  |
| min of spelt    |     |   |             |       |            |   |   |   |   | 60.10 | 28.01 | 2.60  | 6.20 | 51.13 | 14.51 | 50.87 | 5.28  | 33.23 | 2.50   | 11.86 | 0     | 0.55   | 0.73  | 5.00   | 52.80 | 0.00   | 251.33 | 3292.50 | 1535.50 | 1680.33 | 3381.50 | 1846.00 | 8.84 | 61.65 | 7.60  |
| max of spelt    |     |   |             |       |            |   |   |   |   | 77.33 | 46.91 | 3.37  | 8.03 | 63.14 | 21.11 | 56.30 | 7.90  | 54.27 | 16.50  | 97.57 | 46.0  | 17.05  | 19.03 | 216.67 | 62.50 | 97.15  | 520.00 | 4104.33 | 2092.50 | 2257.67 | 4533.00 | 2457.33 | 9.27 | 65.50 | 18.00 |
| max-avg/avg     |     |   |             |       |            |   |   |   |   | 9.68  | 27.01 | 15.00 | 9.81 | 8.46  | 11.19 | 6.34  | 20.79 | 21.38 | 111.61 | 64.40 | 63.89 | 258.91 | 99.49 | 184.87 | 11.70 | 62.64  | 35.67  | 10.74   | 19.47   | 15.49   | 18.51   | 18.51   | 2.02 | 3.18  | 41.15 |

Blue - winter wheat

**Table S2.** Growing and environmental conditions in Hungary (Martonvásár, 2017-2019)

| <b>Growing conditions</b> |                                                                                         | <b>2017, 2018, 2019</b>         |
|---------------------------|-----------------------------------------------------------------------------------------|---------------------------------|
| <b>Location</b>           | geographic coordinates                                                                  | 47°18'N, 18°47'E                |
|                           | altitude                                                                                | 115 m                           |
| <b>Growing parameters</b> | previous crop:                                                                          | facelia, oil radish,<br>facelia |
|                           | sowing density                                                                          | 280 seeds/m <sup>2</sup>        |
| <b>Soil parameters</b>    | soil type                                                                               | chernozem                       |
|                           | pH (KCl)                                                                                | 7.25                            |
|                           | humus (m/m%)                                                                            | 2.8                             |
|                           | P <sub>2</sub> O <sub>5</sub> (mg/kg)                                                   | 210                             |
|                           | K <sub>2</sub> O (mg/kg)                                                                | 210                             |
|                           | yearly average N input through<br>NPK combined fertilizer (active<br>ingredient, kg/ha) | 120                             |

**Table S3.** Meteorological conditions in Hungary (Martonvásár, 2017-2019)

|                      |                                        | 2016/2017 | 2017/2018 | 2018/2019 |
|----------------------|----------------------------------------|-----------|-----------|-----------|
| <b>full season</b>   | Growing period (days)                  | 288       | 282       | 279       |
|                      | Cumulative precipitation (mm)          | 254.7     | 494.5     | 365.6     |
|                      | Mean temperature (°C)                  | 8.3       | 9.67      | 9.3       |
|                      | Absolute min temperature (°C)          | -20.7     | -20.2     | -14.4     |
|                      | Absolute max temperature (°C)          | 35.6      | 32        | 36.0      |
| <b>last 100 days</b> | Cum. precipitation before harvest (mm) | 125.3     | 189.7     | 225.0     |
|                      | Mean temperature (°C)                  | 17.1      | 19.39     | 17.1      |
|                      | Absolute min temp(°C)                  | -0.6      | 2.6       | -0.7      |
|                      | Absolute max temp (°C)                 | 35.6      | 32.0      | 36.0      |
| <b>abs. min-max</b>  | No of days with Tmin $\leq$ 0 °C       | 95        | 82        | 90        |
|                      | No of days with Tmin $\leq$ -10 °C     | 14        | 3         | 6         |
|                      | No of days with Tmax $\geq$ 25 °C      | 49        | 68        | 42        |
|                      | No of days with Tmax $\geq$ 30 °C      | 17        | 8         | 16        |
|                      | No of days with Tmax $\geq$ 35 °C      | 1         | 0         | 1         |

**Table S4.** Mean values of the parameters for each of the dendrogram groups distinguished by quality parameters (a), starch properties (b), country of origin (c.) and spike morphology (d.) where the significant differences are shown by Tukey test results.

| <b>a.Dendrogram quality group</b> | <b>1</b>             | <b>2</b>             | <b>3</b>             | <b>4</b>             | <b>5</b>             | <b>6</b>             | <b>7</b>             | <b>8</b>             |
|-----------------------------------|----------------------|----------------------|----------------------|----------------------|----------------------|----------------------|----------------------|----------------------|
| <b>N</b>                          | <b>27</b>            | <b>36</b>            | <b>24</b>            | <b>27</b>            | <b>30</b>            | <b>48</b>            | <b>36</b>            | <b>48</b>            |
| Test weight (kg/100L)             | 69.36 <sup>a</sup>   | 69.89 <sup>a</sup>   | 72.52 <sup>a</sup>   | 71.99 <sup>a</sup>   | 68.86 <sup>a</sup>   | 70.70 <sup>a</sup>   | 69.47 <sup>a</sup>   | 71.05 <sup>a</sup>   |
| TKW (g)                           | 37.20 <sup>abc</sup> | 36.20 <sup>ab</sup>  | 36.80 <sup>ab</sup>  | 34.89 <sup>a</sup>   | 35.24 <sup>ab</sup>  | 35.27 <sup>ab</sup>  | 40.64 <sup>c</sup>   | 38.91 <sup>bc</sup>  |
| KWidth (mm)                       | 2.96 <sup>ab</sup>   | 2.90 <sup>ab</sup>   | 2.98 <sup>ab</sup>   | 2.85 <sup>a</sup>    | 2.86 <sup>a</sup>    | 2.90 <sup>ab</sup>   | 2.99 <sup>b</sup>    | 3.01 <sup>b</sup>    |
| KLength (mm)                      | 7.41 <sup>bc</sup>   | 7.35 <sup>b</sup>    | 6.95 <sup>a</sup>    | 7.00 <sup>a</sup>    | 7.42 <sup>bc</sup>   | 7.21 <sup>ab</sup>   | 7.69 <sup>c</sup>    | 7.31 <sup>b</sup>    |
| FY (%)                            | 58.32 <sup>abc</sup> | 59.26 <sup>bc</sup>  | 61.13 <sup>c</sup>   | 58.34 <sup>abc</sup> | 55.80 <sup>a</sup>   | 57.53 <sup>ab</sup>  | 57.48 <sup>ab</sup>  | 58.50 <sup>abc</sup> |
| B glucan (mg/g)                   | 6.47 <sup>a</sup>    | 6.65 <sup>a</sup>    | 6.36 <sup>a</sup>    | 6.39 <sup>a</sup>    | 6.57 <sup>a</sup>    | 6.56 <sup>a</sup>    | 6.56 <sup>a</sup>    | 6.59 <sup>a</sup>    |
| Starch (%)                        | 52.72 <sup>ab</sup>  | 52.96 <sup>abc</sup> | 54.05 <sup>d</sup>   | 52.98 <sup>abc</sup> | 52.31 <sup>a</sup>   | 52.68 <sup>ab</sup>  | 52.86 <sup>ab</sup>  | 53.54 <sup>cd</sup>  |
| Protein (%)                       | 19.07 <sup>b</sup>   | 19.22 <sup>b</sup>   | 17.65 <sup>a</sup>   | 18.47 <sup>ab</sup>  | 19.34 <sup>b</sup>   | 19.08 <sup>b</sup>   | 19.56 <sup>b</sup>   | 18.53 <sup>ab</sup>  |
| Gluten (%)                        | 46.20 <sup>cd</sup>  | 42.50 <sup>abc</sup> | 40.35 <sup>ab</sup>  | 39.17 <sup>a</sup>   | 44.66 <sup>c</sup>   | 43.96 <sup>bc</sup>  | 50.09 <sup>d</sup>   | 46.03 <sup>cd</sup>  |
| Gluten sp (mm)                    | 8.31 <sup>bc</sup>   | 6.04 <sup>ab</sup>   | 6.92 <sup>b</sup>    | 3.52 <sup>a</sup>    | 7.47 <sup>b</sup>    | 6.92 <sup>b</sup>    | 10.26 <sup>c</sup>   | 10.16 <sup>c</sup>   |
| GI                                | 51.28 <sup>bc</sup>  | 69.87 <sup>e</sup>   | 72.87 <sup>e</sup>   | 91.70 <sup>f</sup>   | 59.28 <sup>cd</sup>  | 68.12 <sup>de</sup>  | 42.30 <sup>ab</sup>  | 39.62 <sup>a</sup>   |
| Zeleny (ml)                       | 32.17 <sup>ab</sup>  | 36.81 <sup>bc</sup>  | 36.54 <sup>bc</sup>  | 49.22 <sup>d</sup>   | 36.32 <sup>bc</sup>  | 38.26 <sup>c</sup>   | 28.83 <sup>a</sup>   | 27.25 <sup>a</sup>   |
| DevTime (min)                     | 4.33 <sup>ab</sup>   | 3.81 <sup>ab</sup>   | 2.93 <sup>ab</sup>   | 10.83 <sup>d</sup>   | 8.57 <sup>cd</sup>   | 5.64 <sup>bc</sup>   | 2.51 <sup>a</sup>    | 2.35 <sup>a</sup>    |
| Stability (min)                   | 8.63 <sup>bc</sup>   | 9.89 <sup>c</sup>    | 6.28 <sup>ab</sup>   | 17.43 <sup>e</sup>   | 13.97 <sup>de</sup>  | 13.59 <sup>d</sup>   | 5.65 <sup>ab</sup>   | 4.11 <sup>a</sup>    |
| Soft at 12 (FU)                   | 75.69 <sup>cd</sup>  | 69.22 <sup>bcd</sup> | 95.17 <sup>d</sup>   | 23.69 <sup>a</sup>   | 41.58 <sup>ab</sup>  | 51.59 <sup>abc</sup> | 94.43 <sup>d</sup>   | 128.73 <sup>e</sup>  |
| Wabs (%)                          | 55.81 <sup>ab</sup>  | 55.00 <sup>a</sup>   | 55.09 <sup>a</sup>   | 57.45 <sup>c</sup>   | 56.05 <sup>abc</sup> | 56.16 <sup>abc</sup> | 56.84 <sup>bc</sup>  | 56.10 <sup>abc</sup> |
| HunQN                             | 59.82 <sup>bc</sup>  | 61.20 <sup>bc</sup>  | 51.36 <sup>b</sup>   | 86.43 <sup>e</sup>   | 73.96 <sup>d</sup>   | 69.89 <sup>cd</sup>  | 51.26 <sup>b</sup>   | 38.66 <sup>a</sup>   |
| FN (sec)                          | 382.2 <sup>abc</sup> | 401.8 <sup>cd</sup>  | 379.6 <sup>abc</sup> | 418.8 <sup>d</sup>   | 404.1 <sup>d</sup>   | 399.5 <sup>cd</sup>  | 359.2 <sup>ab</sup>  | 345.3 <sup>a</sup>   |
| PeakVisc (cP)                     | 3675.0 <sup>ab</sup> | 3753.9 <sup>bc</sup> | 3862.9 <sup>c</sup>  | 3822.0 <sup>c</sup>  | 3756.2 <sup>bc</sup> | 3736.6 <sup>bc</sup> | 3541.4 <sup>a</sup>  | 3627.8 <sup>ab</sup> |
| TroughVisc (cP)                   | 1730.1 <sup>a</sup>  | 1746.2 <sup>a</sup>  | 1832.5 <sup>b</sup>  | 1845.9 <sup>b</sup>  | 1739.5 <sup>a</sup>  | 1726.2 <sup>a</sup>  | 1722.7 <sup>a</sup>  | 1749.6 <sup>a</sup>  |
| Breakdown (cP)                    | 1944.9 <sup>bc</sup> | 2007.6 <sup>c</sup>  | 2030.4 <sup>c</sup>  | 1976.1 <sup>bc</sup> | 2016.7 <sup>c</sup>  | 2010.4 <sup>c</sup>  | 1818.7 <sup>a</sup>  | 1878.1 <sup>ab</sup> |
| FinalVisc (cP)                    | 3809.9 <sup>ab</sup> | 3841.8 <sup>ab</sup> | 3911.6 <sup>ab</sup> | 3984.2 <sup>b</sup>  | 3768.8 <sup>a</sup>  | 3769.8 <sup>a</sup>  | 3781.8 <sup>ab</sup> | 3812.4 <sup>ab</sup> |
| Setback (cP)                      | 2079.8 <sup>a</sup>  | 2095.5 <sup>a</sup>  | 2079.1 <sup>a</sup>  | 2138.2 <sup>a</sup>  | 2029.3 <sup>a</sup>  | 2043.5 <sup>a</sup>  | 2059.1 <sup>a</sup>  | 2062.7 <sup>a</sup>  |
| PastingTime (min)                 | 9.04 <sup>ab</sup>   | 9.08 <sup>abc</sup>  | 9.11 <sup>cd</sup>   | 9.03 <sup>a</sup>    | 9.05 <sup>ab</sup>   | 9.05 <sup>ab</sup>   | 9.11 <sup>cd</sup>   | 9.13 <sup>d</sup>    |
| PastingTemp (°C)                  | 63.25 <sup>ab</sup>  | 63.62 <sup>ab</sup>  | 63.54 <sup>ab</sup>  | 63.71 <sup>b</sup>   | 63.63 <sup>ab</sup>  | 63.51 <sup>ab</sup>  | 62.86 <sup>a</sup>   | 63.43 <sup>ab</sup>  |
| Starch damage (UCD)               | 12.84 <sup>ab</sup>  | 12.83 <sup>ab</sup>  | 12.01 <sup>a</sup>   | 13.53 <sup>b</sup>   | 13.02 <sup>ab</sup>  | 13.17 <sup>ab</sup>  | 13.24 <sup>ab</sup>  | 12.29 <sup>ab</sup>  |

DevTime- Farinograph dough development time, FN- falling number, FY-flour yield, GI –gluten index, Gluten sp- gluten spread, HunQN- Farinograph quality number, KLength-kernel length, KWidth- kernel width, Soft at 12- dough softening at 12 min, Stability- Farinograph dough stability, Temp-Temperature, TKW- thousand kernel weight, Visc- Viscosity, Wabs- water absorption,

| <b>b.Dendrogram starch group</b> | <b>1</b>            | <b>2</b>           | <b>3</b>            | <b>4</b>           | <b>5</b>            | <b>6</b>            | <b>7</b>           | <b>8</b>           |
|----------------------------------|---------------------|--------------------|---------------------|--------------------|---------------------|---------------------|--------------------|--------------------|
| <b>N</b>                         | <b>45</b>           | <b>18</b>          | <b>54</b>           | <b>27</b>          | <b>39</b>           | <b>45</b>           | <b>24</b>          | <b>24</b>          |
| Test weight (kg/100L)            | 70.45 <sup>a</sup>  | 71.64 <sup>a</sup> | 67.95 <sup>a</sup>  | 70.34 <sup>a</sup> | 71.63 <sup>a</sup>  | 71.16 <sup>a</sup>  | 70.43 <sup>a</sup> | 72.06 <sup>a</sup> |
| TKW (g)                          | 37.01 <sup>ab</sup> | 36.27 <sup>a</sup> | 36.72 <sup>ab</sup> | 40.51 <sup>b</sup> | 37.06 <sup>ab</sup> | 37.58 <sup>ab</sup> | 34.24 <sup>a</sup> | 35.85 <sup>a</sup> |
| KWidth (mm)                      | 2.95 <sup>bc</sup>  | 2.80 <sup>a</sup>  | 2.91 <sup>abc</sup> | 3.01 <sup>c</sup>  | 2.92 <sup>abc</sup> | 2.98 <sup>bc</sup>  | 2.86 <sup>ab</sup> | 2.99 <sup>bc</sup> |

|                     |                       |                       |                      |                     |                       |                                  |                      |                      |
|---------------------|-----------------------|-----------------------|----------------------|---------------------|-----------------------|----------------------------------|----------------------|----------------------|
| KLength (mm)        | 7.39 <sup>cd</sup>    | 7.41 <sup>cd</sup>    | 7.41 <sup>cd</sup>   | 7.67 <sup>d</sup>   | 7.21 <sup>bc</sup>    | 7.35 <sup>bc</sup>               | 7.07 <sup>ab</sup>   | 6.76 <sup>a</sup>    |
| FY (%)              | 58.20 <sup>a</sup>    | 57.23 <sup>a</sup>    | 58.49 <sup>a</sup>   | 57.87 <sup>a</sup>  | 58.34 <sup>a</sup>    | 58.16 <sup>a</sup>               | 57.72 <sup>a</sup>   | 58.98 <sup>a</sup>   |
| B glucan (mg/g)     | 6.45 <sup>a</sup>     | 6.32 <sup>a</sup>     | 6.52 <sup>a</sup>    | 6.50 <sup>a</sup>   | 6.51 <sup>a</sup>     | 6.63 <sup>a</sup>                | 6.60 <sup>a</sup>    | 6.71 <sup>a</sup>    |
| Starch (%)          | 52.48 <sup>a</sup>    | 52.15 <sup>a</sup>    | 52.68 <sup>ab</sup>  | 52.81 <sup>ab</sup> | 53.79 <sup>bc</sup>   | 53.18 <sup>ab</sup> <sup>c</sup> | 52.85 <sup>ab</sup>  | 54.10 <sup>c</sup>   |
| Protein (%)         | 19.36 <sup>bc</sup>   | 20.34 <sup>c</sup>    | 19.40 <sup>bc</sup>  | 19.54 <sup>bc</sup> | 18.42 <sup>b</sup>    | 18.55 <sup>b</sup>               | 18.69 <sup>b</sup>   | 16.85 <sup>a</sup>   |
| Gluten (%)          | 46.53 <sup>cd</sup>   | 49.73 <sup>de</sup>   | 45.11 <sup>c</sup>   | 51.49 <sup>e</sup>  | 41.09 <sup>ab</sup>   | 42.96 <sup>bc</sup>              | 42.61 <sup>bc</sup>  | 37.18 <sup>a</sup>   |
| Gluten sp (mm)      | 8.38 <sup>ab</sup>    | 9.64 <sup>bc</sup>    | 7.42 <sup>ab</sup>   | 11.69 <sup>c</sup>  | 6.44 <sup>a</sup>     | 6.62 <sup>a</sup>                | 5.91 <sup>a</sup>    | 6.59 <sup>a</sup>    |
| GI                  | 53.77 <sup>bc</sup>   | 45.86 <sup>ab</sup>   | 59.85 <sup>cd</sup>  | 38.29 <sup>a</sup>  | 66.79 <sup>cd</sup>   | 67.33 <sup>cd</sup>              | 70.80 <sup>d</sup>   | 73.00 <sup>d</sup>   |
| Zeleny (ml)         | 34.19 <sup>abc</sup>  | 32.11 <sup>ab</sup>   | 35.85 <sup>abc</sup> | 28.56 <sup>a</sup>  | 32.77 <sup>abc</sup>  | 37.51 <sup>bc</sup>              | 39.56 <sup>c</sup>   | 38.85 <sup>bc</sup>  |
| DevTime (min)       | 4.13 <sup>ab</sup>    | 4.80 <sup>ab</sup>    | 4.23 <sup>ab</sup>   | 2.51 <sup>a</sup>   | 5.50 <sup>ab</sup>    | 6.33 <sup>b</sup>                | 5.63 <sup>ab</sup>   | 6.07 <sup>ab</sup>   |
| Stability (min)     | 10.03 <sup>ab</sup>   | 7.59 <sup>ab</sup>    | 9.16 <sup>ab</sup>   | 5.96 <sup>a</sup>   | 10.22 <sup>ab</sup>   | 11.17 <sup>b</sup>               | 11.25 <sup>b</sup>   | 11.17 <sup>b</sup>   |
| Soft at 12 (FU)     | 73.34 <sup>ab</sup>   | 82.36 <sup>ab</sup>   | 79.14 <sup>ab</sup>  | 103.91 <sup>b</sup> | 67.44 <sup>ab</sup>   | 68.40 <sup>ab</sup>              | 62.88 <sup>a</sup>   | 70.10 <sup>ab</sup>  |
| Wabs (%)            | 56.16 <sup>ab</sup>   | 57.08 <sup>b</sup>    | 55.83 <sup>ab</sup>  | 57.17 <sup>b</sup>  | 54.79 <sup>a</sup>    | 56.09 <sup>ab</sup>              | 56.50 <sup>b</sup>   | 56.10 <sup>ab</sup>  |
| HunQN               | 61.08 <sup>a</sup>    | 58.95 <sup>a</sup>    | 57.11 <sup>a</sup>   | 48.99 <sup>a</sup>  | 63.04 <sup>a</sup>    | 65.22 <sup>a</sup>               | 63.57 <sup>a</sup>   | 63.48 <sup>a</sup>   |
| FN (sec)            | 393.7 <sup>ab</sup>   | 366.1 <sup>ab</sup>   | 389.6 <sup>ab</sup>  | 347.1 <sup>a</sup>  | 397.8 <sup>b</sup>    | 386.0 <sup>ab</sup>              | 400.2 <sup>b</sup>   | 366.8 <sup>ab</sup>  |
| PeakVisc (cP)       | 3606.6 <sup>b</sup>   | 3473.9 <sup>a</sup>   | 3648.4 <sup>b</sup>  | 3418.8 <sup>a</sup> | 3910.7 <sup>d</sup>   | 3800.8 <sup>c</sup>              | 3857.7 <sup>cd</sup> | 3902.2 <sup>cd</sup> |
| TroughVisc (cP)     | 1702.3 <sup>ab</sup>  | 1748.9 <sup>b</sup>   | 1750.6 <sup>b</sup>  | 1636.1 <sup>a</sup> | 1766.5 <sup>b</sup>   | 1729.7 <sup>b</sup>              | 1834.1 <sup>c</sup>  | 1954.0 <sup>d</sup>  |
| Breakdown (cP)      | 1904.2 <sup>b</sup>   | 1725.0 <sup>a</sup>   | 1897.7 <sup>b</sup>  | 1782.7 <sup>a</sup> | 2144.2 <sup>f</sup>   | 2071.1 <sup>de</sup>             | 2023.5 <sup>cd</sup> | 1948.1 <sup>bc</sup> |
| FinalVisc (cP)      | 3727.8 <sup>abc</sup> | 3876.7 <sup>bcd</sup> | 3890.0 <sup>cd</sup> | 3583.7 <sup>a</sup> | 3791.6 <sup>bc</sup>  | 3705.5 <sup>ab</sup>             | 4010.6 <sup>de</sup> | 4189.8 <sup>e</sup>  |
| Setback (cP)        | 2025.4 <sup>abc</sup> | 2127.8 <sup>bcd</sup> | 2139.3 <sup>cd</sup> | 1947.5 <sup>a</sup> | 2025.1 <sup>abc</sup> | 1975.8 <sup>ab</sup>             | 2176.4 <sup>cd</sup> | 2235.7 <sup>d</sup>  |
| PastingTime (min)   | 9.09 <sup>a</sup>     | 9.04 <sup>a</sup>     | 9.10 <sup>a</sup>    | 9.10 <sup>a</sup>   | 9.08 <sup>a</sup>     | 9.07 <sup>a</sup>                | 9.06 <sup>a</sup>    | 9.08 <sup>a</sup>    |
| PastingTemp (°C)    | 63.32 <sup>b</sup>    | 62.44 <sup>a</sup>    | 63.60 <sup>b</sup>   | 63.10 <sup>ab</sup> | 63.65 <sup>b</sup>    | 63.67 <sup>b</sup>               | 63.31 <sup>b</sup>   | 63.74 <sup>b</sup>   |
| Starch damage (UCD) | 12.78 <sup>a</sup>    | 13.86 <sup>a</sup>    | 12.71 <sup>a</sup>   | 12.92 <sup>a</sup>  | 12.74 <sup>a</sup>    | 12.81 <sup>a</sup>               | 12.91 <sup>a</sup>   | 12.86 <sup>a</sup>   |

| c. Country            | 1                    | 2                   | 3                    | 4                    | 5                   | 6                   | 7                    | 8                    |
|-----------------------|----------------------|---------------------|----------------------|----------------------|---------------------|---------------------|----------------------|----------------------|
| N                     | 39                   | 63                  | 27                   | 3                    | 24                  | 114                 | 3                    | 3                    |
| Test weight (kg/100L) | 72.07 <sup>ab</sup>  | 69.46 <sup>ab</sup> | 73.07 <sup>abc</sup> | 71.35 <sup>ab</sup>  | 67.41 <sup>a</sup>  | 70.59 <sup>ab</sup> | 79.57 <sup>c</sup>   | 75.60 <sup>bc</sup>  |
| TKW (g)               | 35.09 <sup>a</sup>   | 36.90 <sup>a</sup>  | 38.62 <sup>a</sup>   | 35.14 <sup>a</sup>   | 36.40 <sup>a</sup>  | 37.33 <sup>a</sup>  | 42.63 <sup>a</sup>   | 38.31 <sup>a</sup>   |
| KWidth (mm)           | 2.84 <sup>a</sup>    | 2.96 <sup>ab</sup>  | 2.99 <sup>abc</sup>  | 2.75 <sup>a</sup>    | 3.02 <sup>abc</sup> | 2.91 <sup>a</sup>   | 3.24 <sup>c</sup>    | 3.18 <sup>bc</sup>   |
| KLength (mm)          | 7.06 <sup>a</sup>    | 7.39 <sup>a</sup>   | 7.20 <sup>a</sup>    | 7.10 <sup>a</sup>    | 7.36 <sup>a</sup>   | 7.39 <sup>a</sup>   | 7.08 <sup>a</sup>    | 6.70 <sup>a</sup>    |
| FY (%)                | 57.16 <sup>a</sup>   | 58.68 <sup>a</sup>  | 59.21 <sup>a</sup>   | 60.13 <sup>a</sup>   | 59.20 <sup>a</sup>  | 57.83 <sup>a</sup>  | 60.17 <sup>a</sup>   | 54.72 <sup>a</sup>   |
| B glucan (mg/g)       | 6.68 <sup>a</sup>    | 6.55 <sup>a</sup>   | 6.33 <sup>a</sup>    | 6.56 <sup>a</sup>    | 6.69 <sup>a</sup>   | 6.50 <sup>a</sup>   | 5.95 <sup>a</sup>    | 6.79 <sup>a</sup>    |
| Starch (%)            | 53.27 <sup>ab</sup>  | 53.02 <sup>a</sup>  | 53.65 <sup>abc</sup> | 52.30 <sup>a</sup>   | 52.58 <sup>a</sup>  | 52.72 <sup>a</sup>  | 55.73 <sup>c</sup>   | 55.57 <sup>bc</sup>  |
| Protein (%)           | 18.08 <sup>bc</sup>  | 18.76 <sup>bc</sup> | 18.71 <sup>bc</sup>  | 18.48 <sup>bc</sup>  | 18.75 <sup>bc</sup> | 19.55 <sup>c</sup>  | 16.30 <sup>ab</sup>  | 14.53 <sup>a</sup>   |
| Gluten (%)            | 42.55 <sup>bc</sup>  | 43.73 <sup>bc</sup> | 44.50 <sup>bc</sup>  | 38.10 <sup>abc</sup> | 44.95 <sup>c</sup>  | 46.16 <sup>bc</sup> | 35.97 <sup>ab</sup>  | 28.90 <sup>a</sup>   |
| Gluten sp (mm)        | 7.42 <sup>bc</sup>   | 7.20 <sup>abc</sup> | 8.39 <sup>bc</sup>   | 4.25 <sup>abc</sup>  | 9.63 <sup>c</sup>   | 7.82 <sup>bc</sup>  | 2.50 <sup>ab</sup>   | 1.17 <sup>a</sup>    |
| GI                    | 71.74 <sup>ab</sup>  | 60.67 <sup>a</sup>  | 52.78 <sup>a</sup>   | 92.44 <sup>b</sup>   | 52.71 <sup>a</sup>  | 56.30 <sup>a</sup>  | 97.32 <sup>b</sup>   | 99.70 <sup>b</sup>   |
| Zeleny (ml)           | 37.97 <sup>abc</sup> | 34.95 <sup>ab</sup> | 30.94 <sup>a</sup>   | 52.83 <sup>c</sup>   | 32.38 <sup>a</sup>  | 34.53 <sup>ab</sup> | 48.00 <sup>bc</sup>  | 45.67 <sup>abc</sup> |
| DevTime (min)         | 6.65 <sup>a</sup>    | 4.09 <sup>a</sup>   | 2.96 <sup>a</sup>    | 14.05 <sup>b</sup>   | 3.93 <sup>a</sup>   | 4.81 <sup>a</sup>   | 19.87 <sup>b</sup>   | 1.94 <sup>a</sup>    |
| Stability (min)       | 10.52 <sup>ab</sup>  | 9.88 <sup>ab</sup>  | 7.14 <sup>a</sup>    | 18.60 <sup>b</sup>   | 9.05 <sup>ab</sup>  | 9.45 <sup>ab</sup>  | 17.47 <sup>b</sup>   | 18.17 <sup>b</sup>   |
| Soft at 12 (FU)       | 66.08 <sup>ab</sup>  | 71.56 <sup>ab</sup> | 93.74 <sup>b</sup>   | 5.50 <sup>a</sup>    | 90.79 <sup>b</sup>  | 76.53 <sup>ab</sup> | 45.00 <sup>ab</sup>  | 30.33 <sup>ab</sup>  |
| Wabs (%)              | 56.88 <sup>ab</sup>  | 55.21 <sup>a</sup>  | 55.01 <sup>a</sup>   | 55.05 <sup>a</sup>   | 55.11 <sup>a</sup>  | 56.47 <sup>a</sup>  | 62.90 <sup>c</sup>   | 60.00 <sup>bc</sup>  |
| HunQN                 | 65.98 <sup>ab</sup>  | 59.64 <sup>ab</sup> | 51.09 <sup>a</sup>   | 88.25 <sup>bc</sup>  | 52.51 <sup>a</sup>  | 60.46 <sup>ab</sup> | 100.00 <sup>c</sup>  | 76.90 <sup>abc</sup> |
| FN (sec)              | 400.8 <sup>ab</sup>  | 378.3 <sup>a</sup>  | 369.5 <sup>a</sup>   | 485.0 <sup>b</sup>   | 370.2 <sup>a</sup>  | 383.3 <sup>a</sup>  | 416.0 <sup>ab</sup>  | 428.0 <sup>ab</sup>  |
| PeakVisc (cP)         | 3802.4 <sup>a</sup>  | 3688.7 <sup>a</sup> | 3673.3 <sup>a</sup>  | 3876.5 <sup>a</sup>  | 3702.3 <sup>a</sup> | 3687.1 <sup>a</sup> | 3817.0 <sup>a</sup>  | 3939.0 <sup>a</sup>  |
| TroughVisc (cP)       | 1829.6 <sup>ab</sup> | 1710.5 <sup>a</sup> | 1723.2 <sup>a</sup>  | 1942.5 <sup>bc</sup> | 1681.2 <sup>a</sup> | 1763.7 <sup>a</sup> | 1783.6 <sup>ab</sup> | 2072.0 <sup>c</sup>  |



|                     |                       |                       |                      |                     |                       |                       |                     |                      |
|---------------------|-----------------------|-----------------------|----------------------|---------------------|-----------------------|-----------------------|---------------------|----------------------|
| Breakdown (cP)      | 1972.8 <sup>a</sup>   | 1978.2 <sup>a</sup>   | 1950.0 <sup>a</sup>  | 1934.0 <sup>a</sup> | 2021.1 <sup>a</sup>   | 1923.4 <sup>a</sup>   | 2033.3 <sup>a</sup> | 1867.0 <sup>a</sup>  |
| FinalVisc (cP)      | 3951.5 <sup>abc</sup> | 3763.5 <sup>ab</sup>  | 3692.9 <sup>a</sup>  | 4272.5 <sup>c</sup> | 3742.5 <sup>ab</sup>  | 3852.4 <sup>abc</sup> | 3528.0 <sup>a</sup> | 4157.0 <sup>bc</sup> |
| Setback (cP)        | 2121.8 <sup>bc</sup>  | 2053.0 <sup>abc</sup> | 1969.7 <sup>ab</sup> | 2330.0 <sup>c</sup> | 2061.3 <sup>abc</sup> | 2088.7 <sup>bc</sup>  | 1744.3 <sup>a</sup> | 2085.0 <sup>bc</sup> |
| PastingTime (min)   | 9.07 <sup>abc</sup>   | 9.07 <sup>abc</sup>   | 9.14 <sup>c</sup>    | 9.07 <sup>abc</sup> | 9.05 <sup>abc</sup>   | 9.09 <sup>bc</sup>    | 8.96 <sup>ab</sup>  | 8.91 <sup>a</sup>    |
| PastingTemp (°C)    | 63.62 <sup>b</sup>    | 63.47 <sup>b</sup>    | 63.42 <sup>b</sup>   | 64.23 <sup>b</sup>  | 63.79 <sup>b</sup>    | 63.37 <sup>b</sup>    | 61.60 <sup>a</sup>  | 61.17 <sup>a</sup>   |
| Starch damage (UCD) | 13.32 <sup>a</sup>    | 12.72 <sup>a</sup>    | 12.36 <sup>a</sup>   | 12.35 <sup>a</sup>  | 12.41 <sup>a</sup>    | 12.75 <sup>a</sup>    | 17.35 <sup>b</sup>  | 18.85 <sup>b</sup>   |

| <b>d. Spike morphology</b> | <b>1</b>             | <b>2</b>              | <b>3</b>             | <b>4</b>              | <b>5</b>             | <b>6</b>              | <b>7</b>              | <b>8</b>             | <b>9</b>              |
|----------------------------|----------------------|-----------------------|----------------------|-----------------------|----------------------|-----------------------|-----------------------|----------------------|-----------------------|
| <b>N</b>                   | <b>162</b>           | <b>54</b>             | <b>12</b>            | <b>15</b>             | <b>18</b>            | <b>6</b>              | <b>3</b>              | <b>3</b>             | <b>3</b>              |
| Test weight (kg/100L)      | 70.10 <sup>ab</sup>  | 71.65 <sup>ab</sup>   | 69.78 <sup>ab</sup>  | 67.56 <sup>a</sup>    | 73.13 <sup>abc</sup> | 71.67 <sup>ab</sup>   | 72.07 <sup>abc</sup>  | 79.57 <sup>c</sup>   | 75.60 <sup>bc</sup>   |
| TKW (g)                    | 38.41 <sup>ab</sup>  | 35.89 <sup>ab</sup>   | 34.31 <sup>ab</sup>  | 33.48 <sup>a</sup>    | 33.85 <sup>a</sup>   | 31.64 <sup>a</sup>    | 32.31 <sup>a</sup>    | 42.63 <sup>b</sup>   | 38.31 <sup>ab</sup>   |
| KWidth (mm)                | 2.98 <sup>ab</sup>   | 2.90 <sup>a</sup>     | 2.76 <sup>a</sup>    | 2.75 <sup>a</sup>     | 2.81 <sup>a</sup>    | 2.77 <sup>a</sup>     | 2.87 <sup>a</sup>     | 3.24 <sup>b</sup>    | 3.18 <sup>b</sup>     |
| KLength (mm)               | 7.51 <sup>c</sup>    | 7.06 <sup>bc</sup>    | 7.09 <sup>bc</sup>   | 7.25 <sup>bc</sup>    | 6.89 <sup>b</sup>    | 6.77 <sup>ab</sup>    | 6.20 <sup>a</sup>     | 7.08 <sup>bc</sup>   | 6.70 <sup>ab</sup>    |
| FY (%)                     | 58.21 <sup>a</sup>   | 58.54 <sup>a</sup>    | 60.27 <sup>a</sup>   | 57.45 <sup>a</sup>    | 56.04 <sup>a</sup>   | 57.84 <sup>a</sup>    | 62.23 <sup>a</sup>    | 60.17 <sup>a</sup>   | 54.72 <sup>a</sup>    |
| B glucan (mg/g)            | 6.59 <sup>a</sup>    | 6.55 <sup>a</sup>     | 6.30 <sup>a</sup>    | 6.51 <sup>a</sup>     | 6.22 <sup>a</sup>    | 6.38 <sup>a</sup>     | 6.75 <sup>a</sup>     | 5.95 <sup>a</sup>    | 6.79 <sup>a</sup>     |
| Starch (%)                 | 52.84 <sup>ab</sup>  | 53.46 <sup>abc</sup>  | 52.00 <sup>a</sup>   | 52.76 <sup>ab</sup>   | 53.07 <sup>ab</sup>  | 52.27 <sup>ab</sup>   | 54.53 <sup>bc</sup>   | 55.73 <sup>c</sup>   | 55.57 <sup>c</sup>    |
| Protein (%)                | 19.20 <sup>c</sup>   | 18.62 <sup>bc</sup>   | 19.19 <sup>c</sup>   | 19.03 <sup>c</sup>    | 18.77 <sup>bc</sup>  | 18.73 <sup>bc</sup>   | 14.87 <sup>a</sup>    | 16.30 <sup>ab</sup>  | 14.53 <sup>a</sup>    |
| Gluten (%)                 | 46.03 <sup>c</sup>   | 42.13 <sup>bc</sup>   | 40.94 <sup>bc</sup>  | 43.71 <sup>bc</sup>   | 45.03 <sup>bc</sup>  | 44.33 <sup>bc</sup>   | 38.65 <sup>abc</sup>  | 35.97 <sup>ab</sup>  | 28.90 <sup>a</sup>    |
| Gluten sp (mm)             | 8.02 <sup>bc</sup>   | 7.81 <sup>bc</sup>    | 4.25 <sup>abc</sup>  | 6.93 <sup>abc</sup>   | 9.15 <sup>c</sup>    | 5.58 <sup>abc</sup>   | 10.50 <sup>c</sup>    | 2.50 <sup>ab</sup>   | 1.17 <sup>a</sup>     |
| GI                         | 55.64 <sup>ab</sup>  | 60.65 <sup>ab</sup>   | 92.48 <sup>cd</sup>  | 67.20 <sup>abc</sup>  | 50.20 <sup>a</sup>   | 81.23 <sup>bcd</sup>  | 69.63 <sup>abcd</sup> | 97.32 <sup>cd</sup>  | 99.70 <sup>d</sup>    |
| Zeleny (ml)                | 33.48 <sup>abc</sup> | 32.93 <sup>ab</sup>   | 54.00 <sup>cd</sup>  | 40.67 <sup>abcd</sup> | 31.89 <sup>ab</sup>  | 45.50 <sup>bcd</sup>  | 28.00 <sup>a</sup>    | 48.00 <sup>cd</sup>  | 45.67 <sup>bcd</sup>  |
| DevTime (min)              | 3.94 <sup>ab</sup>   | 5.45 <sup>ab</sup>    | 11.13 <sup>b</sup>   | 3.79 <sup>ab</sup>    | 4.80 <sup>ab</sup>   | 9.78 <sup>b</sup>     | 4.63 <sup>ab</sup>    | 19.87 <sup>c</sup>   | 1.94 <sup>a</sup>     |
| Stability (min)            | 9.07 <sup>abc</sup>  | 8.52 <sup>abc</sup>   | 18.80 <sup>c</sup>   | 11.60 <sup>abc</sup>  | 7.59 <sup>ab</sup>   | 15.02 <sup>abc</sup>  | 6.50 <sup>a</sup>     | 17.47 <sup>bc</sup>  | 18.17 <sup>c</sup>    |
| Soft at 12 (FU)            | 78.63 <sup>a</sup>   | 87.28 <sup>a</sup>    | 10.63 <sup>a</sup>   | 58.63 <sup>a</sup>    | 88.42 <sup>a</sup>   | 36.83 <sup>a</sup>    | 88.33 <sup>a</sup>    | 45.00 <sup>a</sup>   | 30.33 <sup>a</sup>    |
| Wabs (%)                   | 55.88 <sup>a</sup>   | 55.40 <sup>a</sup>    | 56.64 <sup>abc</sup> | 55.83 <sup>a</sup>    | 56.29 <sup>ab</sup>  | 59.47 <sup>bcd</sup>  | 58.67 <sup>abc</sup>  | 62.90 <sup>d</sup>   | 60.00 <sup>cd</sup>   |
| HunQN                      | 58.27 <sup>a</sup>   | 54.60 <sup>a</sup>    | 88.40 <sup>ab</sup>  | 65.39 <sup>ab</sup>   | 57.75 <sup>a</sup>   | 80.47 <sup>ab</sup>   | 58.77 <sup>a</sup>    | 100.00 <sup>b</sup>  | 76.90 <sup>ab</sup>   |
| FN (sec)                   | 375.8 <sup>a</sup>   | 383.1 <sup>a</sup>    | 445.9 <sup>a</sup>   | 425.1 <sup>a</sup>    | 351.6 <sup>a</sup>   | 435.8 <sup>a</sup>    | 416.0 <sup>a</sup>    | 416.0 <sup>a</sup>   | 428.0 <sup>a</sup>    |
| PeakVisc (cP)              | 3646.6 <sup>a</sup>  | 3819.7 <sup>ab</sup>  | 3798.5 <sup>ab</sup> | 3836.4 <sup>ab</sup>  | 3630.2 <sup>a</sup>  | 3862.7 <sup>ab</sup>  | 4009.7 <sup>b</sup>   | 3817.0 <sup>ab</sup> | 3939.0 <sup>ab</sup>  |
| TroughVisc (cP)            | 1712.0 <sup>a</sup>  | 1768.5 <sup>ab</sup>  | 1882.1 <sup>b</sup>  | 1826.3 <sup>ab</sup>  | 1833.9 <sup>ab</sup> | 1804.3 <sup>ab</sup>  | 2075.7 <sup>c</sup>   | 1783.7 <sup>ab</sup> | 2072.0 <sup>c</sup>   |
| Breakdown (cP)             | 1934.6 <sup>a</sup>  | 2051.2 <sup>a</sup>   | 1916.4 <sup>a</sup>  | 2010.1 <sup>a</sup>   | 1796.3 <sup>a</sup>  | 2058.3 <sup>a</sup>   | 1934.0 <sup>a</sup>   | 2033.3 <sup>a</sup>  | 1867.0 <sup>a</sup>   |
| FinalVisc (cP)             | 3757.4 <sup>ab</sup> | 3800.2 <sup>abc</sup> | 4204.1 <sup>cd</sup> | 3940.8 <sup>abc</sup> | 3983.4 <sup>bc</sup> | 3994.0 <sup>bc</sup>  | 4533.0 <sup>d</sup>   | 3528.0 <sup>a</sup>  | 4157.0 <sup>bcd</sup> |
| Setback (cP)               | 2045.4 <sup>ab</sup> | 2031.7 <sup>ab</sup>  | 2322.0 <sup>bc</sup> | 2114.5 <sup>bc</sup>  | 2149.6 <sup>bc</sup> | 2189.7 <sup>bc</sup>  | 2457.3 <sup>c</sup>   | 1744.3 <sup>a</sup>  | 2085.0 <sup>ab</sup>  |
| PastingTime (min)          | 9.09 <sup>b</sup>    | 9.09 <sup>b</sup>     | 9.09 <sup>b</sup>    | 9.09 <sup>b</sup>     | 9.06 <sup>ab</sup>   | 8.90 <sup>a</sup>     | 8.93 <sup>ab</sup>    | 8.96 <sup>ab</sup>   | 8.91 <sup>a</sup>     |
| PastingTemp (°C)           | 63.40 <sup>cde</sup> | 63.71 <sup>cde</sup>  | 64.69 <sup>e</sup>   | 63.88 <sup>de</sup>   | 62.97 <sup>bcd</sup> | 62.50 <sup>abcd</sup> | 62.10 <sup>abc</sup>  | 61.60 <sup>ab</sup>  | 61.17 <sup>a</sup>    |
| Starch damage (UCD)        | 12.87 <sup>abc</sup> | 12.26 <sup>ab</sup>   | 11.28 <sup>a</sup>   | 12.50 <sup>ab</sup>   | 13.01 <sup>abc</sup> | 15.70 <sup>cd</sup>   | 14.83 <sup>bcd</sup>  | 17.35 <sup>de</sup>  | 18.85 <sup>e</sup>    |

**Table S5.** Correlation of the compositional and breadmaking quality traits with starch related properties (n=90)

|                               | Falling<br>Number | Peak<br>Viscosit<br>y | Trough<br>Viscosity | Breakdown<br>Viscosity | Final<br>Viscosit<br>y | Setback<br>Viscosity | Pasting<br>Time | PastingTem<br>perature | Starch<br>Damage |
|-------------------------------|-------------------|-----------------------|---------------------|------------------------|------------------------|----------------------|-----------------|------------------------|------------------|
| Protein content               | 0.1753            | -0.4648               | -0.4297             | -0.3011                | -0.3236                | -0.1697              | -0.0283         | -0.0582                | 0.0829           |
| Starch content                | -0.2877           | 0.3236                | 0.2813              | 0.2221                 | 0.1283                 | -0.0235              | 0.3146          | -0.0769                | -0.0118          |
| B glucan content              | 0.0707            | 0.1356                | 0.0134              | 0.1655                 | -0.0683                | -0.1209              | -0.0393         | -0.0251                | 0.2123           |
| Gluten content                | -0.0664           | -0.6947               | -0.5178             | -0.5363                | -0.4518                | -0.3042              | -0.0294         | -0.3746                | 0.1727           |
| Gluten spread                 | -0.3245           | -0.4745               | -0.2438             | -0.4424                | -0.2712                | -0.2375              | -0.0037         | -0.3551                | 0.0356           |
| Gluten Index                  | 0.4342            | 0.5465                | 0.3302              | 0.4753                 | 0.3487                 | 0.2916               | -0.0987         | 0.3913                 | -0.1127          |
| Zeleny<br>sedimentation       | 0.4193            | 0.2985                | 0.2716              | 0.1965                 | 0.3173                 | 0.2889               | -0.1312         | 0.3935                 | -0.1957          |
| Dough<br>Development<br>Time  | 0.4750            | 0.3009                | 0.1772              | 0.2649                 | 0.1780                 | 0.1418               | -0.2500         | 0.1435                 | 0.1344           |
| Dough Stability               | 0.4991            | 0.3048                | 0.0927              | 0.3285                 | 0.1185                 | 0.1151               | -0.2383         | 0.2794                 | 0.0369           |
| Dough Softening<br>at 12 min  | -0.5288           | -0.3013               | -0.1300             | -0.2981                | -0.1549                | -0.1432              | 0.2879          | -0.1817                | -0.1816          |
| Water<br>absorption           | 0.1807            | -0.2287               | 0.0315              | -0.3165                | -0.0041                | -0.0324              | -0.1468         | -0.4374                | 0.3456           |
| Farinograph<br>quality number | 0.5060            | 0.2559                | 0.1341              | 0.2368                 | 0.1198                 | 0.0834               | -0.2462         | 0.1429                 | 0.2028           |

$r_{5\%} = 0.2050$ ,  $r_{1\%} = 0.2673$ ,  $r_{0.1\%} = 0.3375$
